# Supplementary material for: Global Habitat Suitability of Spodoptera frugiperda (JE Smith) (Lepidoptera, Noctuidae): Key Parasitoids Considered for Its Biological Control
Source: MDPI journal article supplement (doi:10.3390/insects12040273), 2021-03-24
Supplement: s1 [file s1]

**Table S5. Percentage contribution of environmental predictor variables used for the egg-larval parasitoid *Chelonus insularis* models**

| Code                                 | Bioclimatic variables*                                            | Unit | % contribution of environmental variables |            |            |
|--------------------------------------|-------------------------------------------------------------------|------|-------------------------------------------|------------|------------|
|                                      |                                                                   |      | Current                                   | RCP8.5     |            |
|                                      |                                                                   |      |                                           | GISS-E2-R  | HadGEM2-ES |
| <b>Bio1</b>                          | <b>Annual Mean Temperature</b>                                    | °C   | 0.1                                       | 1.2        | 16.9       |
| <b>Bio2</b>                          | <b>Mean Diurnal Range (Mean of monthly (max temp - min temp))</b> | °C   | 11.7                                      | 14.4       | 9.0        |
| <b>Bio5</b>                          | <b>Max Temperature of Warmest Month</b>                           | °C   | 9.3                                       | 0.4        | 0.7        |
| <b>Bio6</b>                          | <b>Min Temperature of Coldest Month</b>                           | °C   | 10                                        | 1.9        | 0          |
| <b>Bio12</b>                         | <b>Annual Precipitation</b>                                       | mm   | 8.6                                       | 3.3        | 0.5        |
| <b>Bio16</b>                         | <b>Precipitation of Wettest Quarter</b>                           | mm   | 57.7                                      | 45.8       | 0          |
| <b>Bio17</b>                         | <b>Precipitation of Driest Quarter</b>                            | mm   | 2.6                                       | 5.7        | 0.2        |
| <b>Total percentage contribution</b> |                                                                   |      | <b>100</b>                                | <b>100</b> |            |

\* Bioclimatic variables in bold represent the intuitively preselected environmental layers that contributed best in final models.
