# Supplementary material for: Global Habitat Suitability of Spodoptera frugiperda (JE Smith) (Lepidoptera, Noctuidae): Key Parasitoids Considered for Its Biological Control
Source: MDPI journal article supplement (doi:10.3390/insects12040273), 2021-03-24
Supplement: s1 [file s1]

**S1 Table. Number of presence records of FAW's parasitoids used in the models**

| <b>Species</b>                | <b>Number of occurrences sourced from published data</b> | <b>Total number of presence points used in the models</b> | <b>References* (listed below)</b> |
|-------------------------------|----------------------------------------------------------|-----------------------------------------------------------|-----------------------------------|
| <i>Telenomus remus</i>        | 45                                                       | 66                                                        | [1-5]                             |
| <i>Trichogramma pretiosum</i> | 1                                                        | 59                                                        | [6]                               |
| <i>Chelonus insularis</i>     | 77                                                       | 98                                                        | [5-19]                            |
| <i>Cotesia marginiventris</i> | 12                                                       | 60                                                        | [5,11,13,17,19-20]                |
| <i>Eiphosoma laphygmae</i>    | 53                                                       | 53                                                        | [11,18,21-30]                     |

**\*References**

1. Agboyi LK, Goergen G, Beseh P, Mensah SA, Clottey VA, Glikpo R, et al. 2020. Parasitoid complex of fall armyworm, *Spodoptera frugiperda*, in Ghana and Benin. *Insects* 2020;11(2): 68. doi: 10.3390/insects11020068.
2. Kenis M, du Plessis H, Van den Berg J, Ba MN, Goergen G, Kwadjo KE, et al. *Telenomus remus*, a Candidate Parasitoid for the Biological Control of *Spodoptera frugiperda* in Africa, is already Present on the Continent. *Insects*. 2019;10(4): 92. doi: 10.3390/insects10040092.
3. Liao YL, Yang B, Xu MF, Lin W, Wang DS, Chen KW, et al. First report of *Telenomus remus* parasitizing *Spodoptera frugiperda* and its field parasitism in southern China. *J Hymenopt Res*. 2019;73: 95-102.
4. HOL: various contributors. Hymenoptera Online (HOL); 2020 [Cited 2020 February 03]. Available from: <https://hol.osu.edu>.

5. Maes JM. Catálogo de los insectos controladores biológicos en Nicaragua. Vol. III. Insectos Parasitoides. Rev Nicar Entomol. 1989;10: 1-138.
6. Gutiérrez-Ramírez A, Robles-Bermúdez A, Cambero-Campos J, Santillán-Ortega C, Ortiz-Catón M, Coronado-Blanco JM, et al. Parasitoides de *Spodoptera frugiperda* (Lepidoptera: Noctuidae) Encontrados en Nayarit, México. Southwest Entomol. 1 September 2015;40(3): 555-564. doi: 10.3958/059.040.0314.
7. Bortolotto OC, Menezes Jr ADO, Hoshino AT, Carvalho MG, Pomari-Fernandes A, Salgado-Neto G. Sugar solution treatment to attract natural enemies and its impact on fall armyworm *Spodoptera frugiperda* in maize fields. Interciencia. 2014;39(6): 416-421.
8. Bridwell JC. List of Kansas Hymenoptera. Trans Kans Acad Sci. 1903;16: 203-211.
9. Canas LA, O'Neil RJ. Applications of sugar solutions to maize, and the impact of natural enemies on fall armyworm. Int J Pest Manage. 1998;44(2): 59-64.
10. Ehler LE. Impact of native predators and parasites on *Spodoptera exigua*, an introduced pest of alfalfa hay in northern California. Biocontrol. 2007;52(3): 323-338.
11. Jourdie V, Alvarez N, Turlings TCJ. Identification of seven species of hymenopteran parasitoids of *Spodoptera frugiperda*, using polymerase chain reaction amplification and restriction enzyme digestion. Agr Forest Entomol. 2008;10(2): 129-136.
12. Jourdie V, Virla E, Murillo H, Bento JMS, Turlings TC, Alvarez N. Phylogeography of *Chelonus insularis* (Hymenoptera: Braconidae) and *Campoletis sonorensis* (Hymenoptera: Ichneumonidae), two primary neotropical parasitoids of the fall armyworm (Lepidoptera: Noctuidae). Ann Entomol Soc Am. 2010;103(5): 742-749.

13. Marengo RA, Saunders JL. Parasitoides del gusano cogollero, *Spodoptera frugiperda* (Lepidoptera: Noctuidae) en maíz en Turrialba, Costa Rica. Manejo Integrado Plagas. 1993;27: 18-23.
14. Molina-Ochoa J, Carpenter JE, Lezama-Gutiérrez R, Foster JE, González-Ramírez M, Angel-Sahagún CA et al. Natural distribution of hymenopteran parasitoids of *Spodoptera frugiperda* (Lepidoptera: Noctuidae) larvae in Mexico. Fla Entomol. 2004;87(4): 461-472.
15. Murúa G, Molina-Ochoa J, Coviella C. Population dynamics of the fall armyworm, *Spodoptera frugiperda* (Lepidoptera: Noctuidae) and its parasitoids in northwestern Argentina. Fla Entomol. 2006;89(2): 175-182.
16. Murúa MG, Molina-Ochoa J, Fidalgo P. Natural distribution of parasitoids of larvae of the fall armyworm, *Spodoptera frugiperda*, in Argentina. J Insect Sci. 2009;9(1): 20.
17. Riggins TM, Wiseman BR, Isenhour DJ, Espelie KE. Incidence of Fall Armyworm (Lepidoptera: Noctuidae) Parasitoids on Resistant and Susceptible Corn Genotypes. Environ Entomol. 1992;21(4): 888-895.
18. Wheeler GS, Ashley TR, Andrews KL. Larval parasitoids and pathogens of the fall armyworm in Honduran maize. Entomophaga. 1989;34: 331-340.
19. Wilson JW. The biology of parasites and predators of *Laphygma exigua* Hübner reared during the season of 1932. Fla Entomol. 1933;17: 1-15.
20. Molina-Ochoa J, Carpenter JE, Heinrichs EA, Foster JE. Parasitoids and parasites of *Spodoptera frugiperda* (Lepidoptera: Noctuidae) in the Americas and Caribbean Basin: an inventory. Fla Entomol. 2003;86(3): 254-289.

21. Fernandez-Triana JL, Grillo-Ravelo H. A taxonomic review of Cuban *Eiphosoma* Cresson (Hymenoptera: Ichneumonidae), with biogeographical notes. *Zootaxa*. 2007;1655: 49-61.
22. Gauld ID. The Ichneumonidae of Costa Rica, 3. *Mem Amer Ent Inst*. 2000;63: 1-453.
23. González-Moreno A, Bordera S. The Ichneumonidae (Hymenoptera: Ichneumonoidea) of Ría Lagartos Biosphere Reserve, Yucatán, Mexico. *Zootaxa*. 2012;3230(1): 1.  
doi:10.11646/zootaxa.3230.1.1.
24. Melo IF. Espécies de *Eiphosoma* Cresson, 1865 (Hymenoptera, Ichneumonidae, Cremastinae) em áreas de mata e cerrado da bacia hidrográfica do rio Mogi-Guaçu. M.Sc. Thesis, Universidade Federal de São Carlos. 2011. Available from:  
<https://repositorio.ufscar.br/handle/ufscar/2021>.
25. Melo IF, Pentead-Dias AM. Estudo qualitativo das espécies de *Eiphosoma* Cresson, 1865 (Hymenoptera, Ichneumonidae, Cremastinae) em ecossistemas brasileiros. VI Congresso Internacional de Meio Ambiente da AUGM. São Carlos, SP: Anais de Eventos da UFSCar. 2009;5: 15.
26. Onody HC, de Melo IF, Pentead-Dias AM. Abundance, richness and diversity of *Eiphosoma* Cresson 1865 (Hymenoptera, Ichneumonidae) species associated with organic crops. *Idesia*. 2012;30(1): 115-120.
27. Shimbori EM, Onody HC, Fernandes DRR, Silvestre R, Tavares MT, Pentead-Dias AM. Hymenoptera “Parasitica” in the state of Mato Grosso do Sul, Brazil. *Iheringia Sér Zool*. 2017;107: 1-12.
28. Silveira JCF, Sasaki ET, Forner MA, Honda MS, Calafiori EMH. Ocorrência de parasitoides de *Spodoptera frugiperda* (J.E. Smith, 1797) em cultura de milho, em Espírito Santo do Pinhal, SP. *Ecossistema*. 1987 ;12: 41-44.

29. Townes H, Townes M. A catalogue and reclassification of Neotropic Ichneumonidae. Mem Amer Ent Inst. 1966;8: 1-367.
30. Valicente FH. Levantamento dos inimigos naturais de *Spodoptera frugiperda* (J.E. Smith, 1797) (Lepidoptera: Noctuidae) em diferentes regioes de Minas Gerais. An Soc Entomol Brasil. 1989;18: 119-130.
